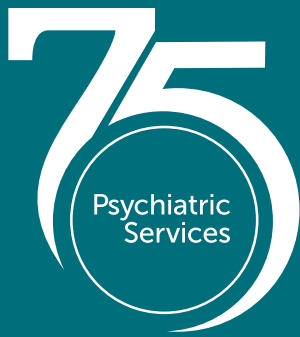

# Psychiatric Services

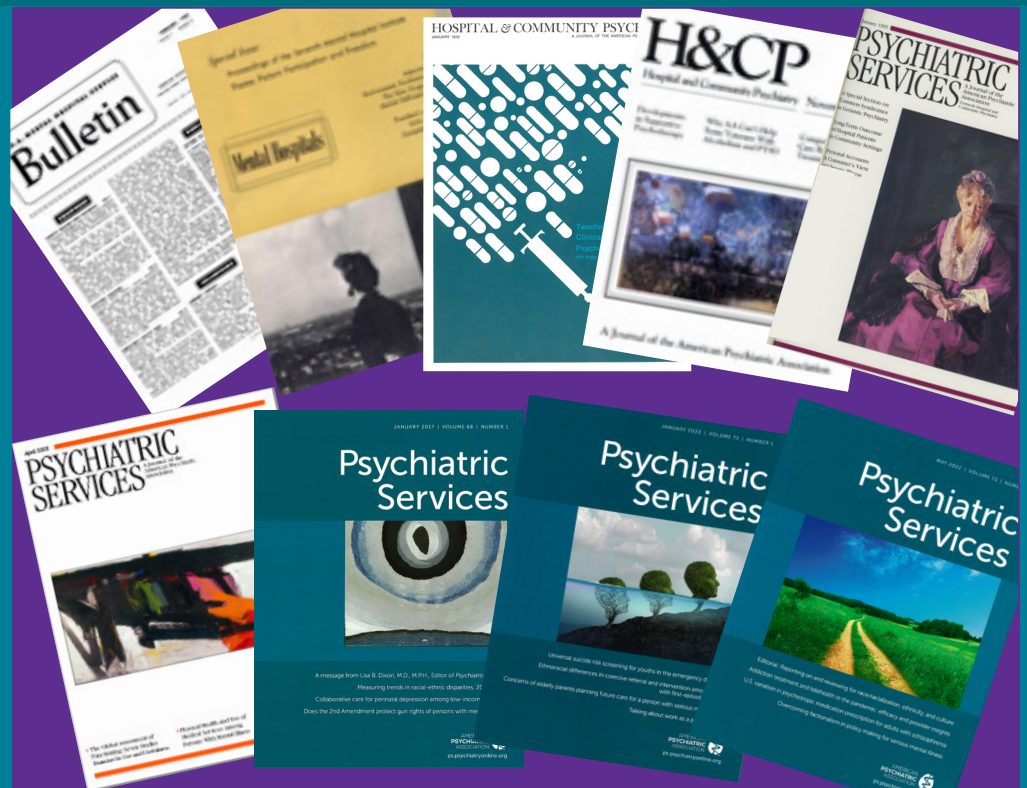

*Psychiatric Services: 75 years of research and commentary*

Viewpoint: Virtual civil commitment hearings

Provider referrals to digital mental health applications, 2019–2021

Burnout and attrition in the public mental health workforce

Navigating a broken system: the state of mental health in child welfare

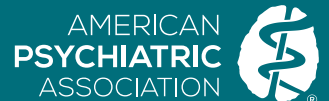

Source: https://psychiatryonline.org/doi/suppl/10.1176/ps.2024.75.issue-1/suppl_file/cover.pdf
